# Supplementary material for: Analyzing Plant Gene Targeting Outcomes and Conversion Tracts with Nanopore Sequencing
Source: Int J Mol Sci. 2021 Sep 8;22(18):9723. doi: 10.3390/ijms22189723 (PMC8467259; doi:10.3390/ijms22189723)
Supplement: Supplementary file 1 [file ijms-22-09723-s001.zip › atkins_GT_IJMS_supplemental_figs.pdf]

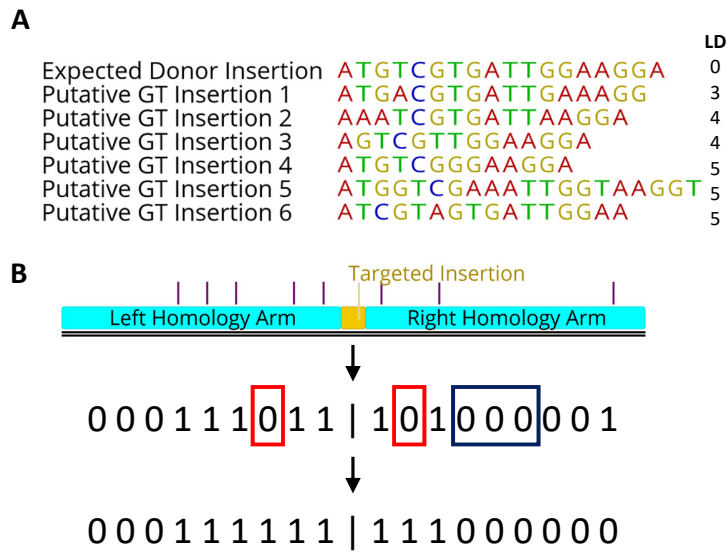

**Figure S1.** Error mitigation strategies when searching for GT events and conversion tracts in Nanopore amplicons. **A)** Example putative GT modifications compared to the expected donor insertion. Insertions scored as GT events due to the Levenshtein Distance (LD) between the insert and the expected modification being  $\leq \frac{1}{3}$  the expected insert size (18bp insertion, LD of 6). **B)** Example amplicon from a putative GT-positive read as analyzed by PANGEA. A subset of all potential donor SNPs are found within the homology arms. SNPs are extracted and converted to a binary format. Spurious SNP calls are reduced using two methods: first, the most interior 3 consecutive SNPs are identified and all exterior SNPs are ignored (blue box), Second, non-SNPs within putative conversion tracts are converted to SNPs (red boxes).

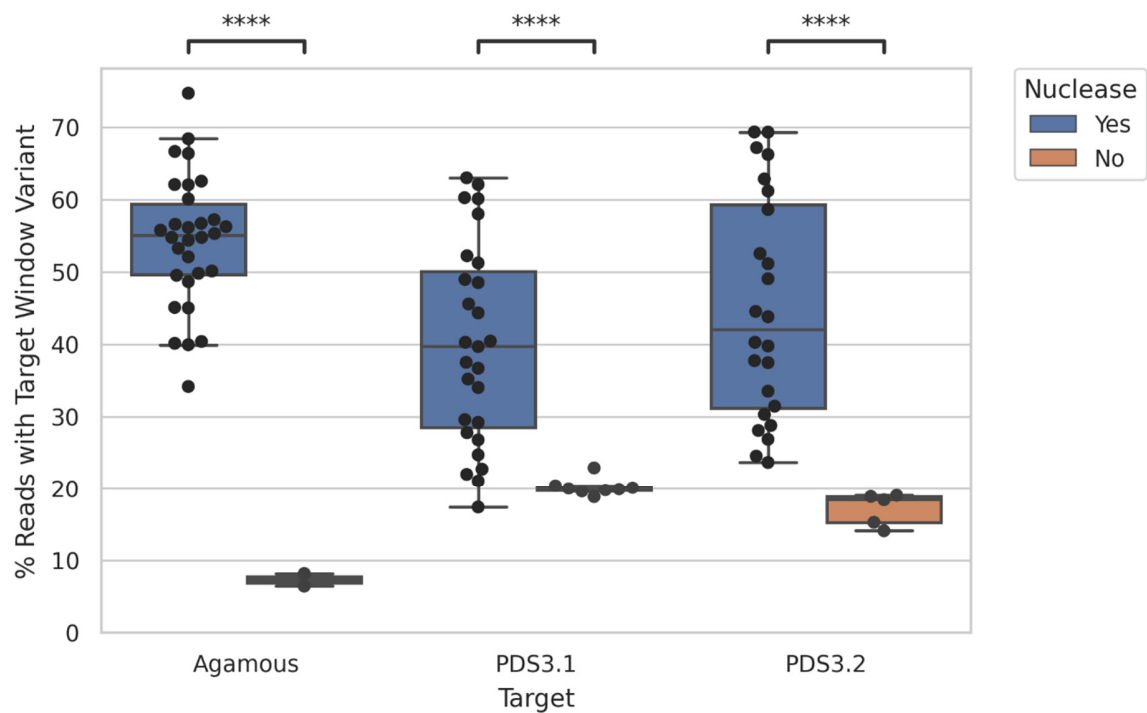

**Figure S2.** Nuclease-induced mutations are readily detectable above nanopore error. Percentage of reads from nuclease and non-nuclease treatments with a variant (non-reference sequence) in the nuclease target window (within 4bp of predicted cut site) at three targets. \*\*\*\* indicates  $p$ -value  $< 1 \times 10^{-4}$  from Welch's t-test with Bonferroni correction (AGAMOUS =  $5.1 \times 10^{-13}$ , PDS3.1 =  $2.0 \times 10^{-7}$ , PDS3.2 =  $1.8 \times 10^{-8}$ )

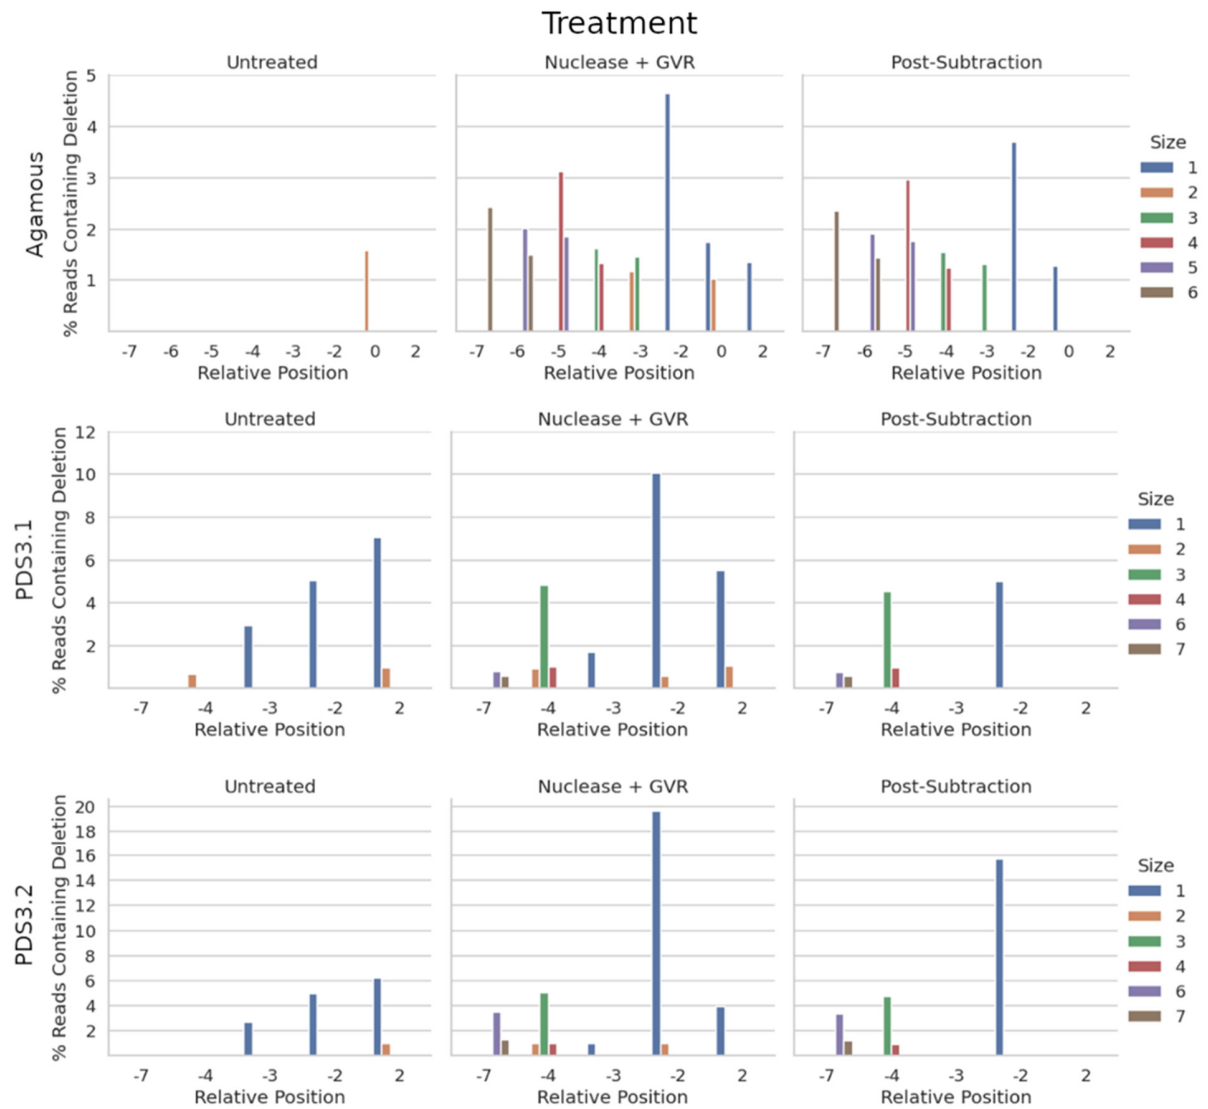

**Figure S3.** Deletions found in PANGEA-analyzed amplicons in ‘Untreated’ and ‘Nuclease and GVR’ samples and the outcome of the subtraction error reduction strategy at three targets from representative samples. Relative position is the distance from the predicted nuclease cut site. Numbers outside the expected target window (e.g., position -7 when target window is 4) are due to the deletion including the target window (e.g., 6bp deletion at position -7 deletes bases within the target window). Size indicates the size of the deletion at the given position. Post-subtraction values were calculated by subtracting the ‘Untreated’ value from the ‘Nuclease and GVR’ on a deletion-specific basis. Variants below 0.5% were ignored.

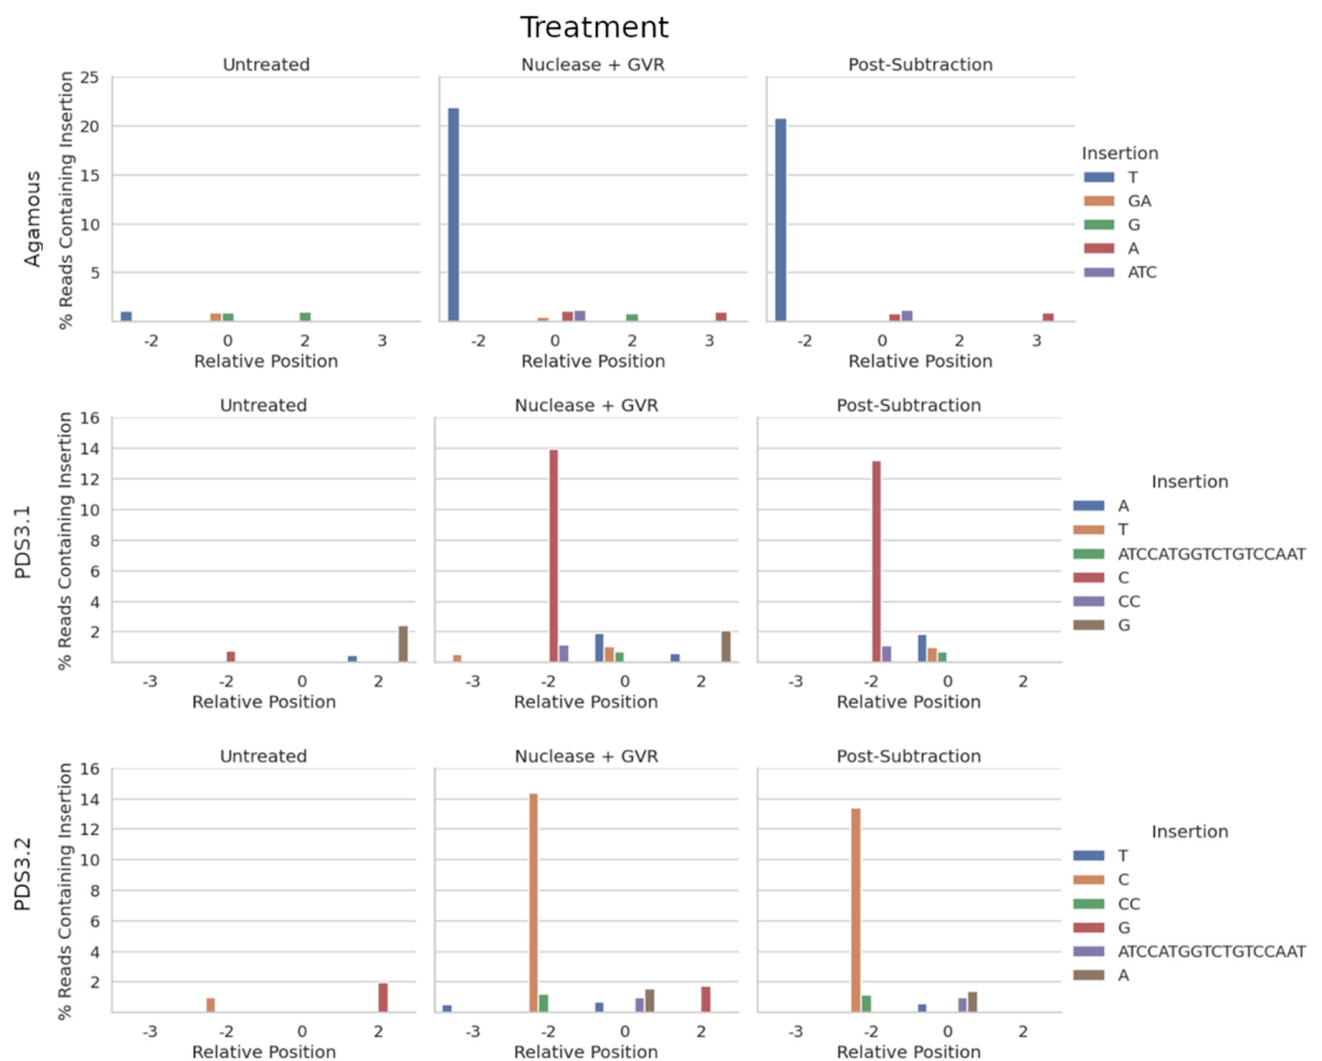

**Figure S4.** Insertions found in PANGEA-analyzed amplicons in ‘Untreated’ and ‘Nuclease and GVR’ samples and the outcome of the subtraction error reduction strategy at three targets from representative samples. Relative position is the distance from the predicted nuclease cut site. Insertion (legend key) indicates the exact nucleotide sequence of the insertion at the given position. Large insertions are the expected gene targeting insertion. A single read may contribute multiple distinct insertions. Post-subtraction values were calculated by subtracting the ‘Untreated’ value from the ‘Nuclease and GVR’ on an insertion-specific basis. Insertions below 0.5% were ignored.

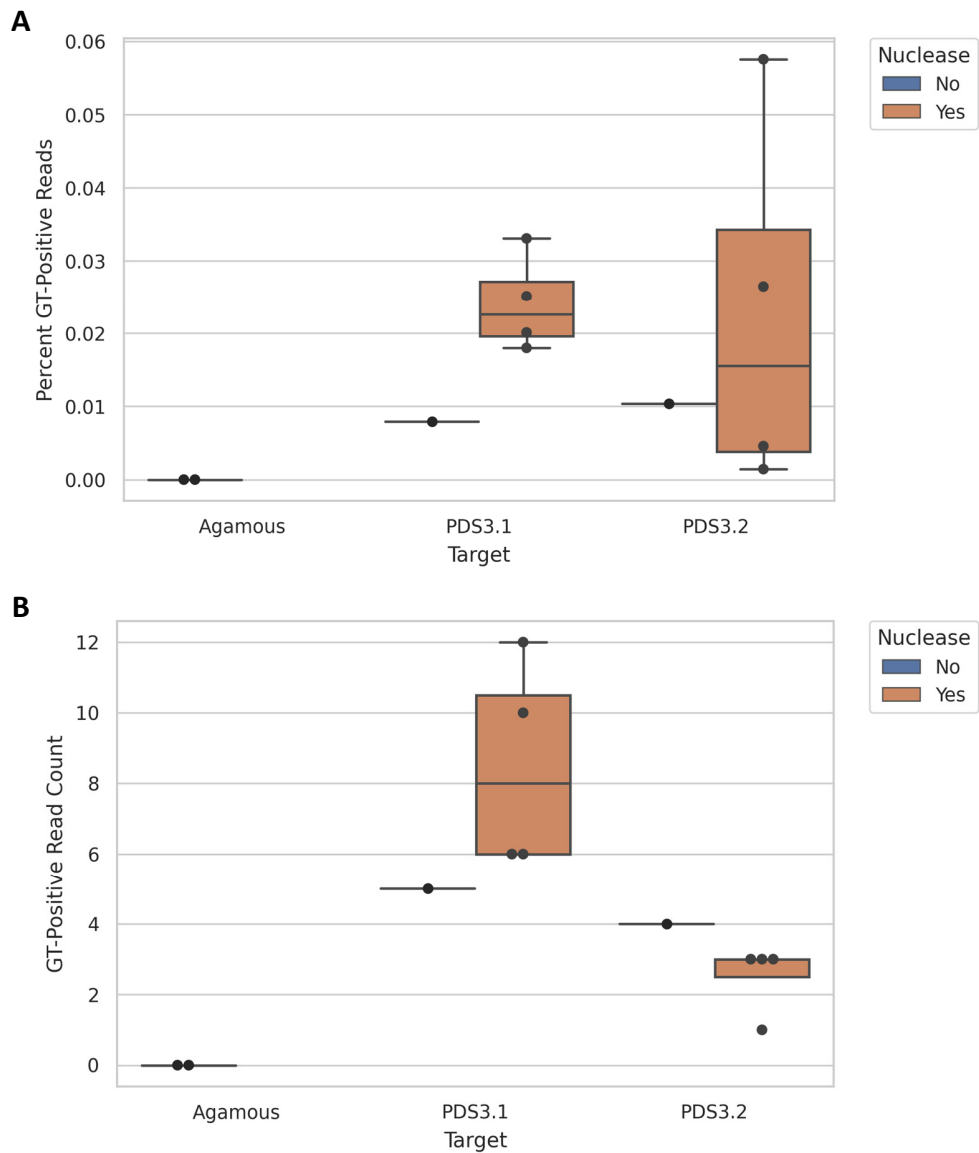

**Figure S5.** Use of 1/3 Levenshtein distance search produces very few false-positive GT events. Background levels of gene targeting found using PANGEA when searching for insertions within 6 Levenshtein distance of the expected 18bp GT insertion at three targets in non-donor samples (with and without nuclease). **A)** Percent GT-positive reads found at three targets. **B)** GT-positive read count at three targets.

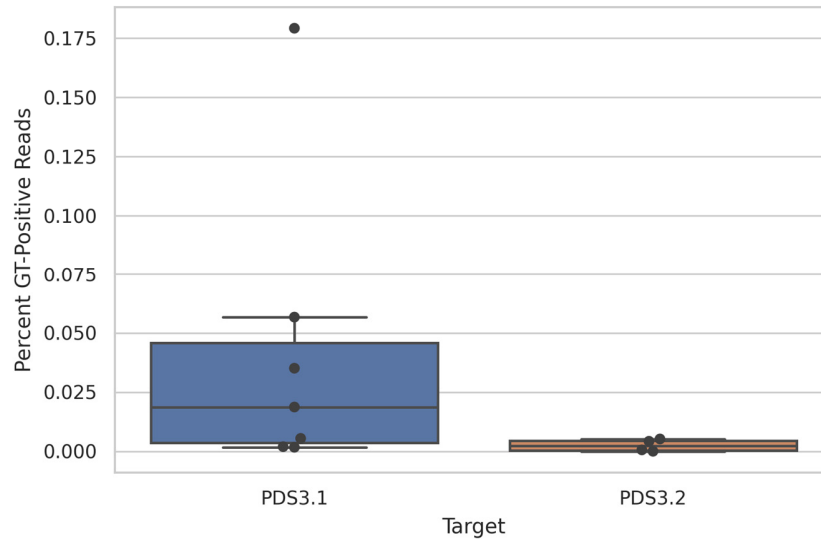

**Figure S6.** PDS treatments lacking a nuclease may be outside the limit of detection. Levels of gene targeting found using PANGEA when searching for insertions within 6 Levenshtein distance of the expected 18bp GT insertion at both *PDS* loci in samples delivered a donor molecule with or without a GVR (data combined) and no nuclease. No significant difference was found between donor molecule alone and donor molecule plus GVR at *PDS3.1* or *PDS3.2* (data not shown).

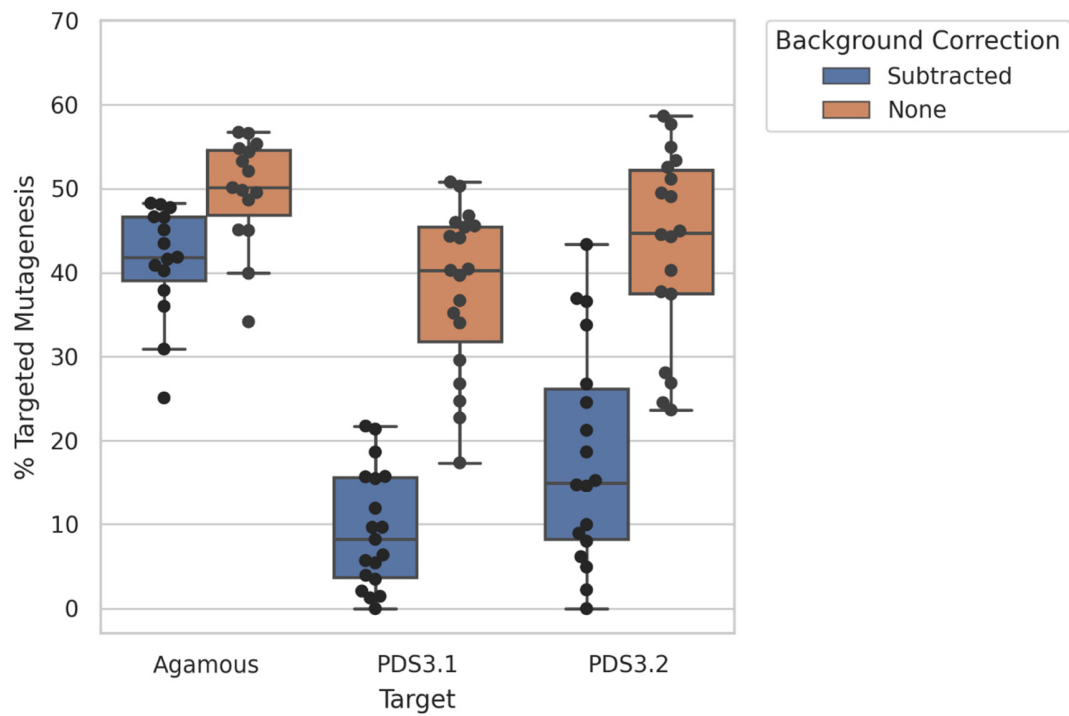

**Figure S7.** Effect of nanopore error background subtraction on estimates of targeted mutagenesis at three loci. Percent of reads with a sequence variant within the target window at three loci before and after background correction in nuclease treated samples. Variants found in the control sample at each locus were subtracted from the experimental samples on a variant-specific basis (see Supplemental Figures 2-3).

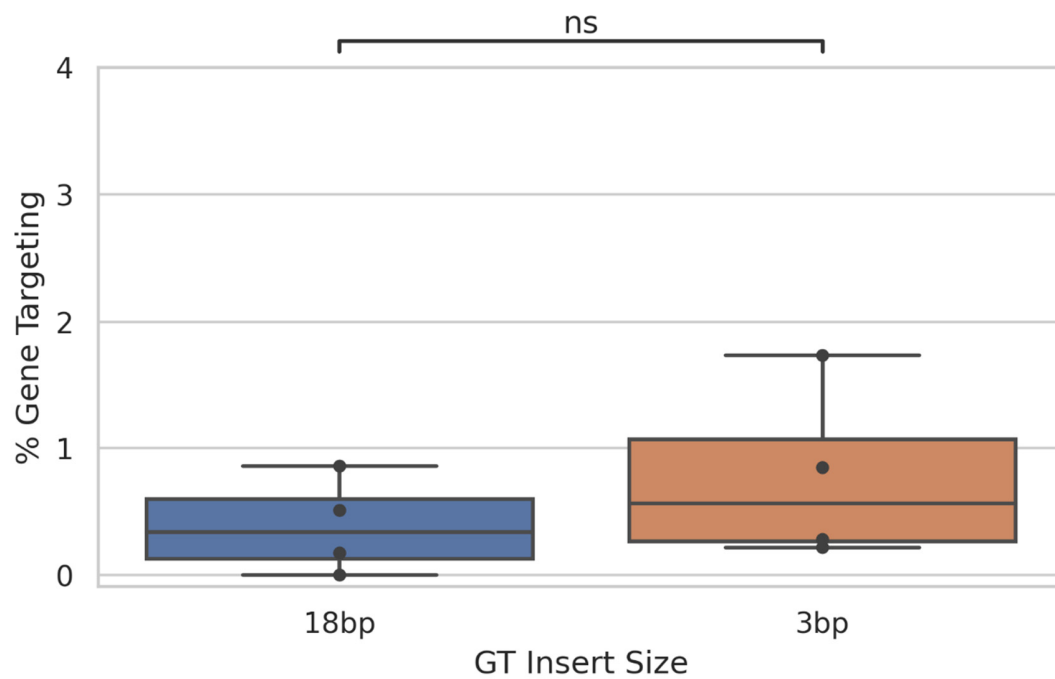

**Figure S8. 18bp and 3bp insertions at *AGAMOUS* perform similarly.** Comparison of gene targeting frequencies at the *AGAMOUS* locus using donors encoding insertions of different sizes delivered with a nuclease and GVR. No statistical difference found using Mann-Whitney test.

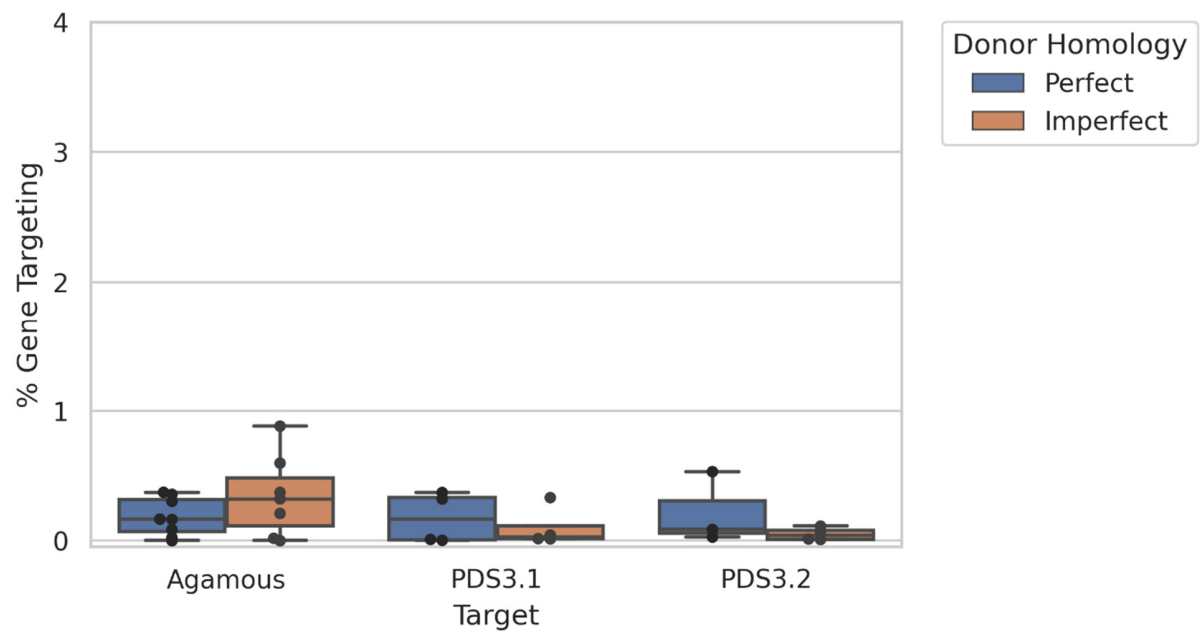

**Figure S9. Non-GVR treatments are likely outside the limit of detection.** Comparison of gene targeting efficiencies at three loci using donors of imperfect or perfect homology when delivered with a nuclease and *no GVR*.

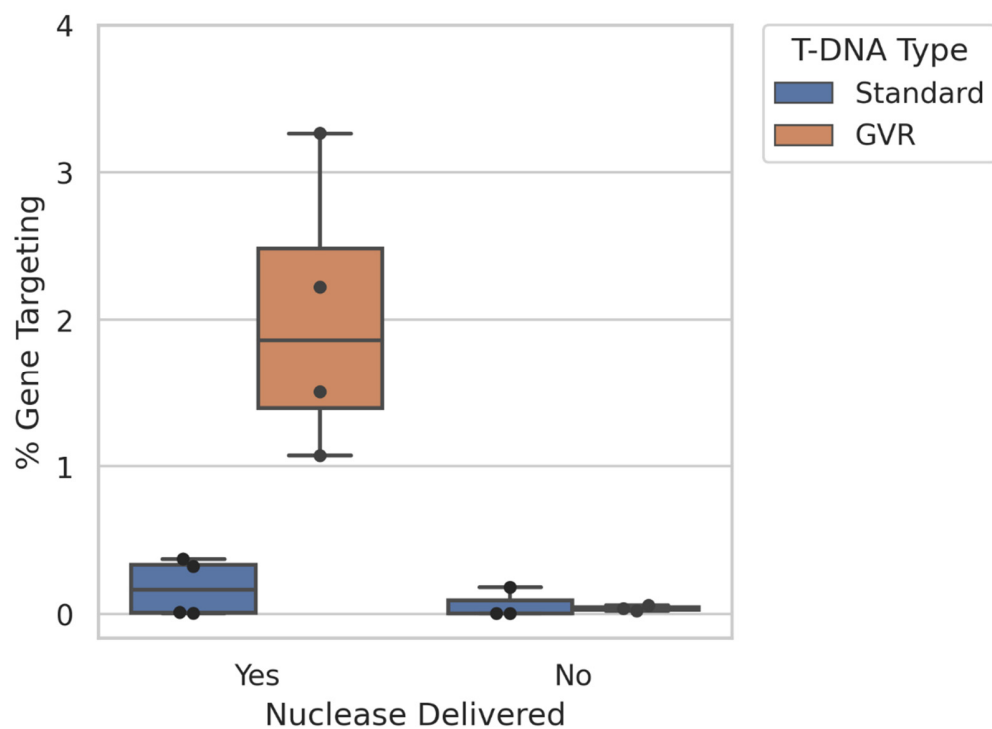

**Figure S10. GVR results in readily detectable GT events.** Gene targeting efficiency at *PDS3.1* when using combinations of nuclease and GVR. Readily quantifiable events are only detectable when both the GVR and nuclease are delivered.





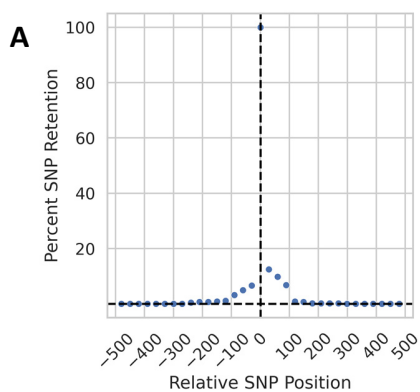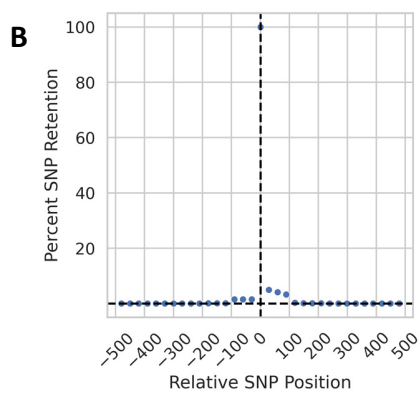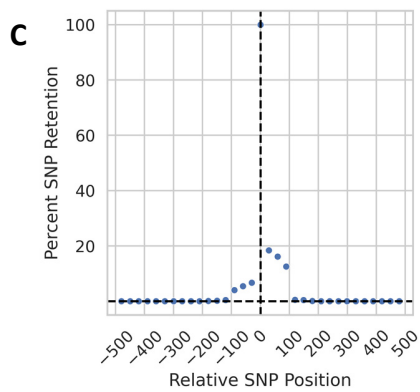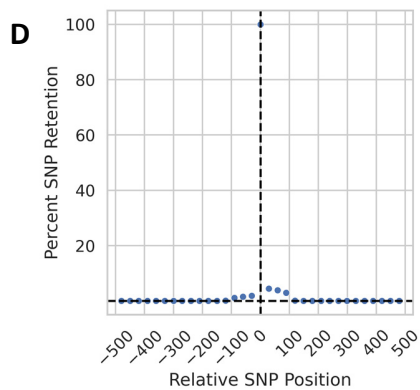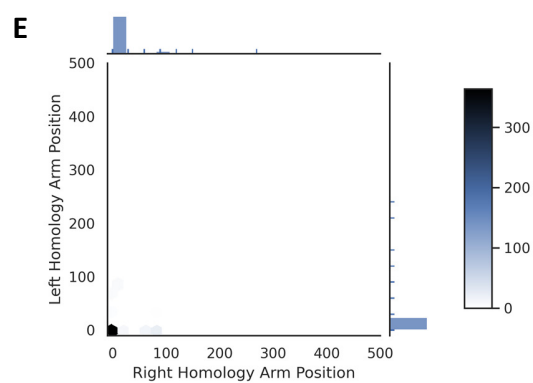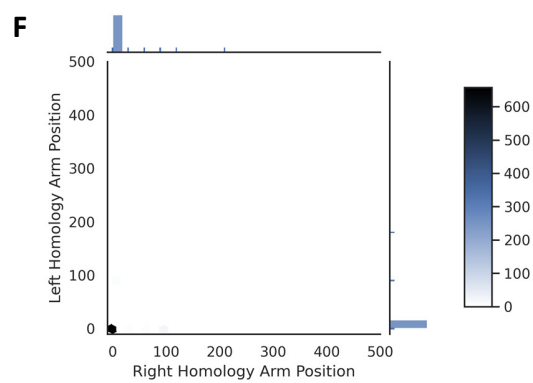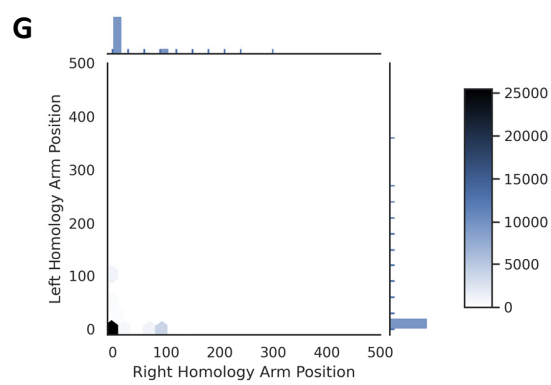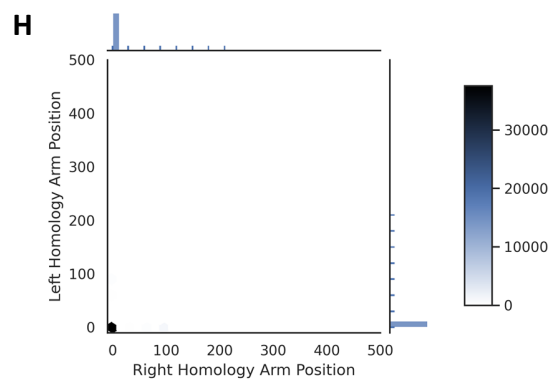

**Figure S13. Negative control SNP conversion tracts at the *AGAMOUS* locus.** SNP conversion tract background at the *AGAMOUS* target when delivered donors encoding 3bp insertions with perfect homology at gene targeting at non-gene targeting reads from representative samples **A)** Background conversion tract pattern from GT-positive reads when delivered a perfect homology donor encoding 3bp insertion and sgRNA. **B)** Background conversion tract pattern from GT-positive reads when delivered a perfect homology donor encoding a 3bp insertion, sgRNA, and GVR. **C)** As in A, but conversion tract patterns from non-GT reads. **D)** As in B, but conversion tract patterns from non-GT reads. **E, F, G, H)** As in A, B, C, and D, but visualized using a hexgrid, respectively.
