# Supplementary material for: Analyzing Plant Gene Targeting Outcomes and Conversion Tracts with Nanopore Sequencing
Source: Int J Mol Sci. 2021 Sep 8;22(18):9723. doi: 10.3390/ijms22189723 (PMC8467259; doi:10.3390/ijms22189723)
Supplement: Supplementary file 1 [file ijms-22-09723-s001.zip › Atkins_GT_IJMS_supplemental_tables.xlsx]

## Sheet: Table S1
Supplemental Table 1. Barcoded Primers for Multiplexed Nanopore Amplicon Sequencing
Oligo Name	Description	Sequence
PPA632	Benthi Agamous F-1	AAGAAAGTTGTCGGTGTCTTTGTG GGAAATTGTGCCAGCTTGGC
PPA633	Benthi Agamous F-2	TCGATTCCGTTTGTAGTCGTCTGT GGAAATTGTGCCAGCTTGGC
PPA634	Benthi Agamous F-3	GAGTCTTGTGTCCCAGTTACCAGG GGAAATTGTGCCAGCTTGGC
PPA635	Benthi Agamous F-4	TTCGGATTCTATCGTGTTTCCCTA GGAAATTGTGCCAGCTTGGC
PPA636	Benthi Agamous F-5	CTTGTCCAGGGTTTGTGTAACCTT GGAAATTGTGCCAGCTTGGC
PPA637	Benthi Agamous F-6	TTCTCGCAAAGGCAGAAAGTAGTC GGAAATTGTGCCAGCTTGGC
PPA638	Benthi Agamous R-1	GTGTTACCGTGGGAATGAATCCTT AATTCCGGAACATTCTAGGC
PPA639	Benthi Agamous R-2	TTCAGGGAACAAACCAAGTTACGT AATTCCGGAACATTCTAGGC
PPA640	Benthi Agamous R-3	AACTAGGCACAGCGAGTCTTGGTT AATTCCGGAACATTCTAGGC
PPA641	Benthi Agamous R-4	AAGCGTTGAAACCTTTGTCCTCTC AATTCCGGAACATTCTAGGC
PPA642	Benthi Agamous R-5	GTTTCATCTATCGGAGGGAATGGA AATTCCGGAACATTCTAGGC
PPA643	Benthi Agamous R-6	CAGGTAGAAAGAAGCAGAATCGGA AATTCCGGAACATTCTAGGC
PPA704	Benthi PDS3.1 F-1	AAGAAAGTTGTCGGTGTCTTTGTG AATGGTGGGACATTTTTGGA
PPA705	Benthi PDS3.1 F-2	TCGATTCCGTTTGTAGTCGTCTGT AATGGTGGGACATTTTTGGA
PPA706	Benthi PDS3.1 F-3	GAGTCTTGTGTCCCAGTTACCAGG AATGGTGGGACATTTTTGGA
PPA707	Benthi PDS3.1 F-4	TTCGGATTCTATCGTGTTTCCCTA AATGGTGGGACATTTTTGGA
PPA708	Benthi PDS3.1 F-5	CTTGTCCAGGGTTTGTGTAACCTT AATGGTGGGACATTTTTGGA
PPA709	Benthi PDS3.1 F-6	TTCTCGCAAAGGCAGAAAGTAGTC AATGGTGGGACATTTTTGGA
PPA710	Benthi PDS3.1 R-1	GTGTTACCGTGGGAATGAATCCTT GCTAGCTTATGAGGTGAAGC
PPA711	Benthi PDS3.1 R-2	TTCAGGGAACAAACCAAGTTACGT GCTAGCTTATGAGGTGAAGC
PPA712	Benthi PDS3.1 R-3	AACTAGGCACAGCGAGTCTTGGTT GCTAGCTTATGAGGTGAAGC
PPA713	Benthi PDS3.1 R-4	AAGCGTTGAAACCTTTGTCCTCTC GCTAGCTTATGAGGTGAAGC
PPA714	Benthi PDS3.1 R-5	GTTTCATCTATCGGAGGGAATGGA GCTAGCTTATGAGGTGAAGC
PPA715	Benthi PDS3.1 R-6	CAGGTAGAAAGAAGCAGAATCGGA GCTAGCTTATGAGGTGAAGC
PPA716	Benthi PDS3.2 F-1	AAGAAAGTTGTCGGTGTCTTTGTG TAGCAAACAAATGACCCACC
PPA717	Benthi PDS3.2 F-2	TCGATTCCGTTTGTAGTCGTCTGT TAGCAAACAAATGACCCACC
PPA718	Benthi PDS3.2 F-3	GAGTCTTGTGTCCCAGTTACCAGG TAGCAAACAAATGACCCACC
PPA719	Benthi PDS3.2 F-4	TTCGGATTCTATCGTGTTTCCCTA TAGCAAACAAATGACCCACC
PPA720	Benthi PDS3.2 F-5	CTTGTCCAGGGTTTGTGTAACCTT TAGCAAACAAATGACCCACC
PPA721	Benthi PDS3.2 F-6	TTCTCGCAAAGGCAGAAAGTAGTC TAGCAAACAAATGACCCACC
PPA722	Benthi PDS3.2 R-1	GTGTTACCGTGGGAATGAATCCTT TGTGGGACAACTCAACACCC
PPA723	Benthi PDS3.2 R-2	TTCAGGGAACAAACCAAGTTACGT TGTGGGACAACTCAACACCC
PPA724	Benthi PDS3.2 R-3	AACTAGGCACAGCGAGTCTTGGTT TGTGGGACAACTCAACACCC
PPA725	Benthi PDS3.2 R-4	AAGCGTTGAAACCTTTGTCCTCTC TGTGGGACAACTCAACACCC
PPA726	Benthi PDS3.2 R-5	GTTTCATCTATCGGAGGGAATGGA TGTGGGACAACTCAACACCC
PPA727	Benthi PDS3.2 R-6	CAGGTAGAAAGAAGCAGAATCGGA TGTGGGACAACTCAACACCC

## Sheet: Table S2
Supplemental Table 2. T-DNAs used in this study and their components
Name	Description	pTRANS Destination	A Module	B Module	C Module
pPPA1176	PDS sgRNA and PDS3.1 Donor	pTRANS_220d	pMOD_A0000d	pMM100	Cloning PCR Amplicon 1
pPPA1177	PDS sgRNA and PDS3.1 Donor and GVR	pTRANS_221	pMOD_A0000d	pMM100	Cloning PCR Amplicon 1
pPPA1178	PDS sgRNA and PDS3.2 Donor	pTRANS_220d	pMOD_A0000d	pMM100	Cloning PCR Amplicon 2
pPPA1179	PDS sgRNA and PDS3.2 Donor and GVR	pTRANS_221	pMOD_A0000d	pMM100	Cloning PCR Amplicon 2
pPPA1192	PDS sgRNA and Left Arm Only PDS3.1 Donor	pTRANS_220d	pMOD_A0000d	pMM100	Cloning PCR Amplicon 3
pPPA1193	PDS sgRNA and Left Arm Only PDS3.1 Donor and GVR	pTRANS_221	pMOD_A0000d	pMM100	Cloning PCR Amplicon 3
pPPA1194	PDS sgRNA and Right Arm Only PDS3.1 Donor	pTRANS_220d	pMOD_A0000d	pMM100	Cloning PCR Amplicon 4
pPPA1195	PDS sgRNA and Right Arm Only PDS3.1 Donor and GVR	pTRANS_221	pMOD_A0000d	pMM100	Cloning PCR Amplicon 4
pPPA1204	PDS3.1 Donor	pTRANS_220d	pMOD_A0000d	pMOD_B000D	Cloning PCR Amplicon 1
pPPA1205	PDS3.1 Donor and GVR	pTRANS_221	pMOD_A0000d	pMOD_B000D	Cloning PCR Amplicon 1
pPPA1206	PDS sgRNA	pTRANS_210d	pMOD_A0000d	pMM100	C0000d
pPPA1207	PDS sgRNA + GVR	pTRANS_211	pMOD_A0000d	pMM100	C0000d
pPPA1208	PDS3.1 SNP donor	pTRANS_210d	pMOD_A0000d	pMOD_B000D	PDS3.1_SNPs (synthesized GG-compatible donor)
pPPA1209	PDS3.1 SNP donor and GVR	pTRANS_211	pMOD_A0000d	pMOD_B000D	PDS3.1_SNPs (synthesized GG-compatible donor)
pPPA1210	PDS sgRNA + and PDS3.1 SNP Donor	pTRANS_210d	pMOD_A0000d	pMM100	PDS3.1_SNPs (synthesized GG-compatible donor)
pPPA1211	PDS sgRNA + and PDS3.1 SNP Donor and GVR	pTRANS_211	pMOD_A0000d	pMM100	PDS3.1_SNPs (synthesized GG-compatible donor)
pPPA1212	PDS3.2 SNP donor	pTRANS_210d	pMOD_A0000d	pMOD_B000D	PDS3.2_SNPs (synthesized GG-compatible donor)
pPPA1213	PDS3.2 SNP donor and GVR	pTRANS_211	pMOD_A0000d	pMOD_B000D	PDS3.2_SNPs (synthesized GG-compatible donor)
pPPA1214	PDS sgRNA + and PDS3.2 SNP Donor	pTRANS_210d	pMOD_A0000d	pMM100	PDS3.2_SNPs (synthesized GG-compatible donor)
pPPA1215	PDS sgRNA + and PDS3.2 SNP Donor and GVR	pTRANS_211	pMOD_A0000d	pMM100	PDS3.2_SNPs (synthesized GG-compatible donor)
PPA_aga1	AGAMOUS sgRNA and AGAMOUS Donor (3bp ins)	pTRANS_220d	pMOD_A0000d	pMM249	Cloning PCR Amplicon 5
PPA_aga2	AGAMOUS sgRNA and AGAMOUS SNP Donor (3bp ins)	pTRANS_220d	pMOD_A0000d	pMM249	Cloning PCR Amplicon 6
PPA_aga3	AGAMOUS sgRNA and AGAMOUS Donor (18bp ins)	pTRANS_220d	pMOD_A0000d	pMM249	Cloning PCR Amplicon 7
PPA_aga4	AGAMOUS sgRNA and AGAMOUS SNP Donor (18bp ins)	pTRANS_220d	pMOD_A0000d	pMM249	Cloning PCR Amplicon 8
PPA_aga9	AGAMOUS sgRNA and AGAMOUS Donor (3bp ins) and GVR	pTRANS_221	pMOD_A0000d	pMM249	Cloning PCR Amplicon 5
PPA_aga10	AGAMOUS sgRNA and AGAMOUS SNP Donor (3bp ins) and GVR	pTRANS_221	pMOD_A0000d	pMM249	Cloning PCR Amplicon 6
PPA_aga11	AGAMOUS sgRNA and AGAMOUS Donor (18bp ins) and GVR	pTRANS_221	pMOD_A0000d	pMM249	Cloning PCR Amplicon 7
PPA_aga12	AGAMOUS sgRNA and AGAMOUS SNP Donor (18bp ins) and GVR	pTRANS_221	pMOD_A0000d	pMM249	Cloning PCR Amplicon 8
pTRANS and pMODs Source:
Čermák, Tomáš, et al. "A multipurpose toolkit to enable advanced genome engineering in plants." The Plant Cell 29.6 (2017): 1196-1217.
pMM Source:
Maher, Michael F., et al. "Plant gene editing through de novo induction of meristems." Nature biotechnology 38.1 (2020): 84-89.

## Sheet: Table S3
Supplemental Table 3. Synthesized Fragments
Name	Sequence
PDS3.1 18bp Insertion Donor	GATTTTGGTTTCTTTGGTTACATCAGCTGAATGCTTTGCTTGAGAAAAGCTCTCTTTTTCCCGTTTAGGATCTTGTTTATTTGCTTTCGTTTTTCTACTCGTTTGAATTTTAACTTGATTTTGTGGGTGAAGGCTAATTTTTCTCATAGTGTAAGAACAAGTTTCATATGTACTGTAAAAGCTAGAATCTTTTTTACTTTTGCATATAAATTTGTGTAATAAATGCTTAAGAACCAGAATATTTGAAAAAGATAAGGAATTTTGCATAGTATTTAGGTTCACAAGTGGGACAATCTTCTTACACTGAAATATCTTTATGTCAGGCTTAATTTACTGCTATCTTGTTCAATAAAATGCCCCAAATTGGACTTGTTTCTGCCGTTAATTTGAGAGTCCAAG…
PDS3.2 18bp Insertion Donor	ATTTTGGTTTCTTTGGTTACATCAGCTGAATGCTTTACTTGAGAAAAGCTTTCTCCTTTTCCCGTTTAGGATCTTGTTTATTTGCTTTCGTTTTTCTACTCGTTAAAATTTTAACTTGATTTTGTGGGTGAATTATAACTTTACTCATAGTGCGAGAACAAGTTTCGTATGGACTGTAAAAGCTAGAATCTTTTTTACTTTTGCATATAAATTTGTGTAATAAATGCTTAAGAACCAGAATATTGAAAAAACAAAGGAATTCTACATAGTATTTAGGTTCACAAGTGGGACAATCTTCTTACAGTGAAATATCTTTATGTCAGGCTTAATTTACTGCTATTTTGTTCAGTAAAATGCCCCAAATTGGACTTGTTTCTGCCGTTAATTTGAGAGTCCAAG…
PDS3.1_SNPs (GG-compatible donor)	GCGCCCACCTGCAACGCCGGGATTTTGGTTTCTTTGGTTACATCAGCTGAATGCTTTGCTTGAGAAAAGCCCTCTTTTTCCCGTTTAGGATCTTGTTTATTTGCTTTCGTTTTTCTACTCATTTGAATTTTAACTTGATTTTGTGGGTGAAGGCTAATTTTTCTCATAGTATAAGAACAAGTTTCATATGTACTGTAAAAGCTAGAATCTTTTTTACTTTCGCATATAAATTTGTGTAATAAATGCTTAAGAACCAGAATATTTGAAAAAAATAAGGAATTTTGCATAGTATTTAGGTTCACAAGTGGGACAATCTTCTTGCACTGAAATATCTTTATGTCAGGCTTAATTTACTGCTATCTTGTTCAATGAAATGCCCCAAATTGGACTTGTTTCTGC…
PDS3.2_SNPs (GG-compatible donor)	GCGCCCACCTGCAACGCCGGATTTTGGTTTCTTTGGTTACATCAGCTGAATGCTTTACTTGAGAAAAGCTCTCTCCTTTTCCCGTTTAGGATCTTGTTTATTTGCTTTCGTTTTTCTACTTGTTAAAATTTTAACTTGATTTTGTGGGTGAATTATAACTTTACTCATAGCGCGAGAACAAGTTTCGTATGGACTGTAAAAGCTAGAATCTTTTTTACTTCTGCATATAAATTTGTGTAATAAATGCTTAAGAACCAGAATATTGAAAAAGCAAAGGAATTCTACATAGTATTTAGGTTCACAAGTGGGACAATCTTCTTGCAGTGAAATATCTTTATGTCAGGCTTAATTTACTGCTATTTTGTTCAGTGAAATGCCCCAAATTGGACTTGTTTCTGC…
AGAMOUS 3bp insertion donor (synthesized)	TGTTATTATAGCCAAGTTCAACCAGCAAGGGTTAGGATGGTTGGAATCCTTTCACCTTAACCAAAAGTCTTGCATTCGTACTTCGGGGATGATTTTTTTCTTTGGCACTGAGTATTTTTACCCCTTAGTTGTCAGATAAGGCCTGAATTCGAATTAGTCGTGTCAGTATGGATATGGCTAAACAGAATCAACCATTGAAGAATATTTAAAGAGAATAGGCTTAACTATTGCTAGGCAGGATAGTGCTGTGAAAAATGAAATTTAGGGTACAAAAAATATAAATTATATAAAGGGTCTTTTTGCTGTCCTCTCTTAAATTTTGATTTTGACGGCCATGAGAATATAATGAATCTTGTGAATATCTAAATGGTCATCTTTCTAGTTATTTAGCTCGGATAT…
AGAMOUS 3bp SNP insertion donor (synthesized)	TGTTATTATAGCCAAGTTCAGCCAGCAAGGGTTAGGATGGTTGGAATCCTCTCACCTTAACCAAAAGTCTTGCATTCGTATTTCGGGGATGATTTTTTTCTTTGGCACTGGGTATTTTTACCCCTTAGTTGTCAGATAAGACCTGAATTCGAATTAGTCGTGTCAGTATGAATATGGCTAAACAGAATCAACCATTGAAGGATATTTAAAGAGAATAGGCTTAACTATTGTTAGGCAGGATAGTGCTGTGAAAAATGAAACTTAGGGTACAAAAAATATAAATTATATAAGGGGTCTTTTTGCTGTCCTCTCTTAAATTTCGATTTTGACGGCCATGAGAATATAATGAACCTTGTGAATATCTAAATGGTCATCTTTCTGGTTATTTAGCTCGGATAT…
AGAMOUS 18bp insertion donor (synthesized)	TGTTATTATAGCCAAGTTCAACCAGCAAGGGTTAGGATGGTTGGAATCCTTTCACCTTAACCAAAAGTCTTGCATTCGTACTTCGGGGATGATTTTTTTCTTTGGCACTGAGTATTTTTACCCCTTAGTTGTCAGATAAGGCCTGAATTCGAATTAGTCGTGTCAGTATGGATATGGCTAAACAGAATCAACCATTGAAGAATATTTAAAGAGAATAGGCTTAACTATTGCTAGGCAGGATAGTGCTGTGAAAAATGAAATTTAGGGTACAAAAAATATAAATTATATAAAGGGTCTTTTTGCTGTCCTCTCTTAAATTTTGATTTTGACGGCCATGAGAATATAATGAATCTTGTGAATATCTAAATGGTCATCTTTCTAGTTATTTAGCTCGGATAT…
AGAMOUS 18bp SNP insertion donor (synthesized)	TGTTATTATAGCCAAGTTCAGCCAGCAAGGGTTAGGATGGTTGGAATCCTCTCACCTTAACCAAAAGTCTTGCATTCGTATTTCGGGGATGATTTTTTTCTTTGGCACTGGGTATTTTTACCCCTTAGTTGTCAGATAAGACCTGAATTCGAATTAGTCGTGTCAGTATGAATATGGCTAAACAGAATCAACCATTGAAGGATATTTAAAGAGAATAGGCTTAACTATTGTTAGGCAGGATAGTGCTGTGAAAAATGAAACTTAGGGTACAAAAAATATAAATTATATAAGGGGTCTTTTTGCTGTCCTCTCTTAAATTTCGATTTTGACGGCCATGAGAATATAATGAACCTTGTGAATATCTAAATGGTCATCTTTCTGGTTATTTAGCTCGGATAT…

## Sheet: Table S4
Supplemental Table 4. Cloning Amplicons and Primers Used
Amplicon Name	Description	Primer 1	Primer 2	Template
Cloning PCR Amplicon 1	PDS3.1 donor with 18bp insertion for Gibson cloning into BaeI site of pMOD_C0000	ACGCCGGGGCGCGCCCTAT GATTTTGGTTTCTTTGGTTA	GCTAGTCACTGAGCTCTAAC CAAACTAGTTTTCAAACCGC	PDS3.1 18bp Insertion donor (synthesized)
Cloning PCR Amplicon 2	PDS3.2 donor with 18bp insertion for Gibson cloning into BaeI site of pMOD_C0000	ACGCCGGGGCGCGCCCTAT ATTTTGGTTTCTTTGGTTAC	GCTAGTCACTGAGCTCTAAC AATAGCTCAAAACAAACTAA	PDS3.2 18bp Insertion donor (synthesized)
Cloning PCR Amplicon 3	PDS3.1 donor (left arm only) with 18bp insertion for AarI Golden Gate cloning into pTRANS vector	GCGCCCACCTGCAACGCCGGGATTTTGGTTTCTTTGGTTA	TTCATCACCTGCTAGTCACTATTGGACAGACCATGGATGG	PDS3.1 18bp Insertion donor (synthesized)
Cloning PCR Amplicon 4	PDS3.1 donor (right arm only) with 18bp insertion for AarI Golden Gate cloning into pTRANS vector	GCGCCCACCTGCAACGCCGGATCCATGGTCTGTCCAATAT	TTCATCACCTGCTAGTCACTCAAACTAGTTTTCAAACCGC	PDS3.2 18bp Insertion donor (synthesized)
Cloning PCR Amplicon 5	AGAMOUS 3bp insertion donor for AarI Golden Gate cloning into pTRANS vector	AGCGCCCACCTGCAACGCCGGC TGTTATTATAGCCAAGTTC	TTTTTCATCACCTGCTAGTCACT TCCCTTAGCCTAAAAGCCT	AGAMOUS 3bp insertion donor (synthesized)
Cloning PCR Amplicon 6	AGAMOUS 3bp insertion SNP donor for AarI Golden Gate cloning into pTRANS vector	AGCGCCCACCTGCAACGCCGGC TGTTATTATAGCCAAGTTC	TTTTTCATCACCTGCTAGTCACT TCCCTTAGCCTAAAAGCCT	AGAMOUS 3bp SNP insertion donor (synthesized)
Cloning PCR Amplicon 7	AGAMOUS 18bp insertion donor for AarI Golden Gate cloning into pTRANS vector	AGCGCCCACCTGCAACGCCGGC TGTTATTATAGCCAAGTTC	TTTTTCATCACCTGCTAGTCACT TCCCTTAGCCTAAAAGCCT	AGAMOUS 18bp insertion donor (synthesized)
Cloning PCR Amplicon 8	AGAMOUS 18bp insertion SNP donor for AarI Golden Gate cloning into pTRANS vector	AGCGCCCACCTGCAACGCCGGC TGTTATTATAGCCAAGTTC	TTTTTCATCACCTGCTAGTCACT TCCCTTAGCCTAAAAGCCT	AGAMOUS 18bp SNP insertion donor (synthesized)

## Sheet: Table S5
Supplemental Table 5. Summary of PANGEA Output for All Samples
file	rep	label	Arms	Target	Vector	Donor Homology	T-DNA	Insert Size	Divergence %	Donor	Arm Length	Nuclease	Muts	Muts_Sub	Ins	Ins_Sub	Dels	Dels_Sub	SNPs	SNPs_Sub	Reads	GT Freq	GT Count	GT:Mut
AGA_E1_3-1.fastq	1	Donor Nuclease	Standard	Agamous	PPA_aga3	Perfect	Standard	18bp	0	Yes	500	Yes	39.9356	30.9146	17.4233	13.4469	22.5122	17.4677	7.44512	2.56157	44096	0.16328	72	0.00408859
AGA_E1_3-2.fastq	1	Donor Nuclease	Standard	Agamous	PPA_aga3	Perfect	Standard	18bp	0	Yes	500	Yes	45.0218	37.8949	14.0245	10.8905	30.9973	27.0044	6.19312	0.982085	47246	0	0	0
AGA_E1_4-1.fastq	1	SNPDonor Nuclease	Standard	Agamous	PPA_aga4	Imperfect	Standard	18bp	3.3	Yes	500	Yes	48.6505	40.2245	21.0638	17.1344	27.5868	23.0901	8.03887	2.70764	18933	0.322189	61	0.00662252
AGA_E1_4-2.fastq	1	SNPDonor Nuclease	Standard	Agamous	PPA_aga4	Imperfect	Standard	18bp	3.3	Yes	500	Yes	50.1221	41.6088	23.3055	18.7455	26.8166	22.8633	5.27173	1.47053	9826	0	0	0
AGA_E1_11-1.fastq	1	Donor Nuclease GVR	Standard	Agamous	PPA_aga11	Perfect	GVR	18bp	0	Yes	500	Yes	56.125	48.3302	28.7656	25.5117	27.3594	22.8185	6.01562	1.4848	19200	0	0	0
AGA_E1_11-2.fastq	1	Donor Nuclease GVR	Standard	Agamous	PPA_aga11	Perfect	GVR	18bp	0	Yes	500	Yes	54.7694	48.1997	21.8777	19.7307	32.8917	28.469	5.28616	1.50838	21963	0.173018	38	0.00315903
AGA_E1_12-1.fastq	1	SNPDonor Nuclease GVR	Standard	Agamous	PPA_aga12	Imperfect	GVR	18bp	3.3	Yes	500	Yes	40.3874	32.6983	21.7251	18.4896	18.6622	14.2087	6.37956	1.85206	16161	0	0	0
AGA_E1_12-2.fastq	1	SNPDonor Nuclease GVR	Standard	Agamous	PPA_aga12	Imperfect	GVR	18bp	3.3	Yes	500	Yes	55.7618	48.332	25.6256	22.9281	30.1362	25.4039	4.58666	1.27384	18423	0.037996	7	0.000681398
AGA_E1_wt-1.fastq	1	wt		Agamous	None	None	None			No	500	No	6.41822	0	3.89016	0	2.52806	0	2.51716	0	18354	0	0	0
AGA_E1_wt-2.fastq	1	wt		Agamous	None	None	None			No	500	No	8.17088	0	4.45458	0	3.7163	0	5.44173	0	12055	0	0	0
AGA_E1_1-1.fastq	1	3bpDonor Nuclease	Standard	Agamous	PPA_aga1	Perfect	Standard	3bp	0	Yes	500	Yes	49.8028	41.843	16.2741	13.0582	33.5286	28.7847	8.54039	3.18349	33968	0.303227	103	0.00608855
AGA_E1_1-2.fastq	1	3bpDonor Nuclease	Standard	Agamous	PPA_aga1	Perfect	Standard	3bp	0	Yes	500	Yes	52.0813	43.471	21.312	17.6249	30.7692	25.846	7.85881	2.43707	3003	0.1665	5	0.00319693
AGA_E1_2-1.fastq	1	3bpSNPDonor Nuclease	Standard	Agamous	PPA_aga2	Imperfect	Standard	3bp	3.3	Yes	500	Yes	45.0883	36.0022	18.1279	14.022	26.9604	21.9803	6.88939	1.99413	23108	0.882811	204	0.0195796
AGA_E1_2-2.fastq	1	3bpSNPDonor Nuclease	Standard	Agamous	PPA_aga2	Imperfect	Standard	3bp	3.3	Yes	500	Yes	34.1639	25.1048	16.9491	12.9091	17.2148	12.1957	6.5451	0.595561	51932	0.20989	109	0.00614361
AGA_E1_9-1.fastq	1	3bpDonor Nuclease GVR	Standard	Agamous	PPA_aga9	Perfect	GVR	3bp	0	Yes	500	Yes	62.5394	54.9318	31.5826	28.6647	30.9569	26.267	9.52773	3.48718	36441	0.279905	102	0.00447565
AGA_E1_9-2.fastq	1	3bpDonor Nuclease GVR	Standard	Agamous	PPA_aga9	Perfect	GVR	3bp	0	Yes	500	Yes	62.0749	55.2425	28.9463	26.2459	33.1285	28.9966	6.82605	2.05095	46220	0.216357	100	0.00348541
AGA_E1_10-1.fastq	1	3bpSNPDonor Nuclease GVR	Standard	Agamous	PPA_aga10	Imperfect	GVR	3bp	3.3	Yes	500	Yes	40.1323	29.4856	19.6086	14.5657	20.5237	14.9199	7.45741	3.71689	11036	0.244654	27	0.00609618
AGA_E1_10-2.fastq	1	3bpSNPDonor Nuclease GVR	Standard	Agamous	PPA_aga10	Imperfect	GVR	3bp	3.3	Yes	500	Yes	57.2193	49.2736	24.1576	20.7898	33.0617	28.4839	5.76572	1.36148	8221	0.267607	22	0.00467687
AGA_E2_1-1.fastq	2	3bpDonor Nuclease	Standard	Agamous	PPA_aga1	Perfect	Standard	3bp	0	Yes	500	Yes	56.705	48.1096	20.6512	17.0405	36.0538	31.069	11.9439	4.52291	118337	0.372665	441	0.00657199
AGA_E2_1-3.fastq	2	3bpDonor Nuclease	Standard	Agamous	PPA_aga1	Perfect	Standard	3bp	0	Yes	500	Yes	56.5783	48.2708	22.6457	19.1961	33.9327	29.0748	11.8073	4.66925	145105	0.356983	518	0.00630953
AGA_E2_2-1.fastq	2	3bpSNPDonor Nuclease	Standard	Agamous	PPA_aga2	Imperfect	Standard	3bp	3.3	Yes	500	Yes	54.7653	46.6533	21.5506	18.1371	33.2147	28.5161	10.8352	4.3703	201224	0.597841	1203	0.0109164
AGA_E2_2-2.fastq	2	3bpSNPDonor Nuclease	Standard	Agamous	PPA_aga2	Imperfect	Standard	3bp	3.3	Yes	500	Yes	49.5314	40.8696	17.4	13.9548	32.1313	26.9148	10.0028	4.07909	166333	0.372145	619	0.00751332
AGA_E2_9-1.fastq	2	3bpDonor Nuclease GVR	Standard	Agamous	PPA_aga9	Perfect	GVR	3bp	0	Yes	500	Yes	56.2535	49.3861	26.5723	23.7113	29.6813	25.6747	11.3121	4.43324	40753	1.72748	704	0.0307088
AGA_E2_9-2.fastq	2	3bpDonor Nuclease GVR	Standard	Agamous	PPA_aga9	Perfect	GVR	3bp	0	Yes	500	Yes	68.3966	60.0547	26.1636	23.3208	42.2331	36.7339	10.8439	4.21168	8401	0.845137	71	0.0123564
AGA_E2_10-1.fastq	2	3bpSNPDonor Nuclease GVR	Standard	Agamous	PPA_aga10	Imperfect	GVR	3bp	3.3	Yes	500	Yes	60.0883	52.2678	29.527	25.8167	30.5613	26.4511	12.0833	5.39142	26491	0.369937	98	0.00615655
AGA_E2_10-2.fastq	2	3bpSNPDonor Nuclease GVR	Standard	Agamous	PPA_aga10	Imperfect	GVR	3bp	3.3	Yes	500	Yes	74.6958	68.1516	31.104	28.826	43.5918	39.3255	12.3025	4.98085	28604	0.492938	141	0.00659927
AGA_E2_3-1.fastq	2	Donor Nuclease	Standard	Agamous	PPA_aga3	Perfect	Standard	18bp	0	Yes	500	Yes	55.309	47.7455	22.3294	19.5238	32.9796	28.2217	11.8108	3.70664	34206	0.0233877	8	0.000422855
AGA_E2_3-2.fastq	2	Donor Nuclease	Standard	Agamous	PPA_aga3	Perfect	Standard	18bp	0	Yes	500	Yes	53.256	45.1007	20.1268	16.8765	33.1292	28.2242	9.7464	2.9987	9306	0.085966	8	0.00161421
AGA_E2_4-1.fastq	2	SNPDonor Nuclease	Standard	Agamous	PPA_aga4	Imperfect	Standard	18bp	3.3	Yes	500	Yes	54.3758	46.594	22.0508	18.5959	32.325	27.9981	10.5813	4.12287	48860	0.01842	9	0.000338753
AGA_E2_11-1.fastq	2	Donor Nuclease GVR	Standard	Agamous	PPA_aga11	Perfect	GVR	18bp	0	Yes	500	Yes	66.3661	60.3251	32.077	29.7923	34.2891	30.5328	11.7681	4.85843	80285	0.856947	688	0.0129124
AGA_E2_11-2.fastq	2	Donor Nuclease GVR	Standard	Agamous	PPA_aga11	Perfect	GVR	18bp	0	Yes	500	Yes	62.0378	55.3416	26.5044	24.2533	35.5335	31.0883	10.6349	3.40016	17499	0.5086	89	0.00819823
AGA_E2_12-1.fastq	2	SNPDonor Nuclease GVR	Standard	Agamous	PPA_aga12	Imperfect	GVR	18bp	3.3	Yes	500	Yes	66.648	59.237	22.6915	20.4111	43.9565	38.8259	11.9167	3.60733	92744	0.133701	124	0.00200608
PDS3.1_PA1_1176-1.fastq	1	Donor Nuclease	Standard	PDS3.1	1176	Perfect	Standard	18bp	0	Yes	500	Yes	36.6848	11.8701	13.3589	6.20844	23.3259	5.66167	18.0855	2.01202	213707	0.371069	793	0.0101151
PDS3.1_PA1_1176-2.fastq	1	Donor Nuclease	Standard	PDS3.1	1176	Perfect	Standard	18bp	0	Yes	500	Yes	45.5691	21.3915	19.0314	11.7879	26.5378	9.60357	19.4835	3.07973	263176	0.320698	844	0.00703761
PDS3.1_PA1_1177-1.fastq	1	Donor Nuclease GVR	Standard	PDS3.1	1177	Perfect	GVR	18bp	0	Yes	500	Yes	63.0033	38.289	30.8091	23.2347	32.1942	15.0543	20.4848	5.17583	304303	2.22048	6757	0.0352439
PDS3.1_PA1_1177-2.fastq	1	Donor Nuclease GVR	Standard	PDS3.1	1177	Perfect	GVR	18bp	0	Yes	500	Yes	52.2275	28.0991	22.3575	14.677	29.87	13.4221	16.5872	3.16415	96026	3.2637	3134	0.06249
PDS3.1_PA1_1178.fastq	1	Donor Nuclease	Standard	PDS3.1	1178	Imperfect	Standard	18bp	10	Yes	500	Yes	44.3341	18.6613	17.6768	10.4268	26.6573	8.23445	18.8486	2.46079	127755	0.331885	424	0.00748601
PDS3.1_PA1_1179.fastq	1	Donor Nuclease GVR	Standard	PDS3.1	1179	Imperfect	GVR	18bp	10	Yes	500	Yes	60.2544	35.4821	23.4641	15.6216	36.7903	19.8605	17.9754	3.49237	112103	0.233714	262	0.00387878
PDS3.1_PA1_1188.fastq	1	InvDonor Nuclease	Inv	PDS3.1	1188	Perfect	Standard	18bp	0	Yes	500	Yes	39.6801	15.7213	15.5634	8.87146	24.1168	6.84988	17.6528	2.13622	82225	0.422013	347	0.0106354
PDS3.1_PA1_1189.fastq	1	InvDonor Nuclease GVR	Inv	PDS3.1	1189	Perfect	GVR	18bp	0	Yes	500	Yes	58.0113	32.7069	24.8845	17.0536	33.1268	15.6533	18.7121	3.39127	137499	3.52293	4844	0.0607284
PDS3.1_PA1_1192.fastq	1	Ldonor Nuclease	Single	PDS3.1	1192	Perfect	Standard	18bp	0	Yes	0	Yes	34.0273	9.6252	12.1723	5.12566	21.855	4.49954	17.1855	0.700654	170190	0.291439	496	0.00856487
PDS3.1_PA1_1193.fastq	1	Ldonor Nuclease GVR	Single	PDS3.1	1193	Perfect	GVR	18bp	0	Yes	0	Yes	60.1072	35.8301	23.9994	16.6797	36.1079	19.1504	19.4859	4.22452	43647	0.0481133	21	0.000800457
PDS3.1_PA1_1194.fastq	1	Rdonor Nuclease	Single	PDS3.1	1194	Perfect	Standard	18bp	0	Yes	0	Yes	40.275	15.5053	14.1485	7.51141	26.1264	7.99394	16.3974	1.85268	51136	0.041067	21	0.00101966
PDS3.1_PA1_1195.fastq	1	Rdonor Nuclease GVR	Single	PDS3.1	1195	Perfect	GVR	18bp	0	Yes	0	Yes	62.082	38.0133	25.7535	18.2801	36.3284	19.7332	19.9735	4.58365	61211	0.102923	63	0.00165785
PDS3.1_PA1_1204.fastq	1	Donor	Standard	PDS3.1	1204	Perfect	Standard	18bp	0	Yes	500	No	22.9039	0	6.19	0	16.7139	0	14.8985	0	301971	0.179156	541	0.0078221
PDS3.1_PA1_1205.fastq	1	Donor GVR	Standard	PDS3.1	1205	Perfect	GVR	18bp	0	Yes	500	No	18.8242	0	4.51706	0	14.3071	0	12.6308	0	319323	0.0566824	181	0.00301115
PDS3.2_PA1_1176-1.fastq	1	Donor Nuclease	Standard	PDS3.2	1176	Imperfect	Standard	18bp	10	Yes	500	Yes	37.4608	21.2547	12.4727	8.96105	24.9881	12.2936	14.3419	2.188	121762	0.0706296	86	0.00188543
PDS3.2_PA1_1176-2.fastq	1	Donor Nuclease	Standard	PDS3.2	1176	Imperfect	Standard	18bp	10	Yes	500	Yes	58.6298	43.3557	21.8741	18.2499	36.7557	25.1058	16.9298	3.95197	180410	0.111967	202	0.00190973
PDS3.2_PA1_1177-1.fastq	1	Donor Nuclease GVR	Standard	PDS3.2	1177	Imperfect	GVR	18bp	10	Yes	500	Yes	69.3135	54.0114	29.8142	26.4796	39.4993	27.5319	19.5165	6.00574	147547	0.062353	92	0.00089958
PDS3.2_PA1_1177-2.fastq	1	Donor Nuclease GVR	Standard	PDS3.2	1177	Imperfect	GVR	18bp	10	Yes	500	Yes	61.1807	46.2913	24.0009	20.4284	37.1798	25.8629	16.4155	4.43501	40011	0.149959	60	0.00245108
PDS3.2_PA1_1178.fastq	1	Donor Nuclease	Standard	PDS3.2	1178	Perfect	Standard	18bp	0	Yes	500	Yes	49.0528	33.7727	17.8992	13.9743	31.1536	19.7984	15.3528	2.95877	99982	0.532096	532	0.0108474
PDS3.2_PA1_1179.fastq	1	Donor Nuclease	Standard	PDS3.2	1179	Perfect	GVR	18bp	0	Yes	500	Yes	62.8431	48.1489	21.1693	17.6335	41.6738	30.5154	16.4925	3.73169	67546	2.02529	1368	0.0322277
PDS3.2_PA1_1188.fastq	1	InvDonor Nuclease	Inv	PDS3.2	1188	Perfect	Standard	18bp	10	Yes	500	Yes	52.5383	36.9256	18.3607	14.7437	34.1776	22.1819	15.8482	3.30079	83145	0.0481087	40	0.000915688
PDS3.2_PA1_1189.fastq	1	InvDonor Nuclease GVR	Inv	PDS3.2	1189	Perfect	GVR	18bp	10	Yes	500	Yes	69.3317	54.4347	22.9937	19.3243	46.3379	35.1104	17.698	4.18568	119850	0.103463	124	0.00149229
PDS3.2_PA1_1192.fastq	1	Ldonor Nuclease	Single	PDS3.2	1192	Perfect	Standard	18bp	10	Yes	0	Yes	40.2702	24.5575	13.1975	10.1126	27.0727	14.445	15.4179	2.2054	130290	0.0107453	14	0.000266829
PDS3.2_PA1_1193.fastq	1	Ldonor Nuclease GVR	Single	PDS3.2	1193	Perfect	GVR	18bp	10	Yes	0	Yes	67.1663	51.64	24.5595	20.9125	42.6068	30.7275	17.1988	4.98984	32293	0	0	0
PDS3.2_PA1_1194.fastq	1	Rdonor Nuclease	Single	PDS3.2	1194	Perfect	Standard	18bp	10	Yes	0	Yes	51.1397	36.5724	14.6492	11.6504	36.4905	24.9221	14.3507	2.70177	59314	0.0101157	6	0.000197804
PDS3.2_PA1_1195.fastq	1	Rdonor Nuclease GVR	Single	PDS3.2	1195	Perfect	GVR	18bp	10	Yes	0	Yes	66.2212	51.3179	23.7323	20.1423	42.4889	31.1756	17.7211	4.61043	42204	0.00710833	3	0.000107342
PDS3.2_PA1_1204.fastq	1	Donor	Standard	PDS3.2	1204	Imperfect	Standard	18bp	10	Yes	500	No	15.2576	0	3.01232	0	12.2453	0	11.7189	0	171927	0.000581642	1	3.81214e-05
PDS3.2_PA1_1205.fastq	1	Donor GVR	Standard	PDS3.2	1205	Imperfect	GVR	18bp	10	Yes	500	No	14.0815	0	2.58719	0	11.4943	0	11.7247	0	260050	0.00422996	11	0.000300391
PDS3.1_EG1_1166-1.fastq	2	Donor	Standard	PDS3.1	1166	Perfect	Standard	18bp	0	Yes	500	No	19.9034	0	3.10285	0	16.8006	0	17.7691	0	118633	0.00168587	2	8.47027e-05
PDS3.1_EG1_1166-2.fastq	2	Donor	Standard	PDS3.1	1166	Perfect	Standard	18bp	0	Yes	500	No	19.7842	0	3.11806	0	16.6662	0	17.6431	0	103077	0.0019403	2	9.80729e-05
PDS3.1_EG1_1167-1.fastq	2	Donor GVR	Standard	PDS3.1	1167	Perfect	GVR	18bp	0	Yes	500	No	20.1082	0	3.10769	0	17.0005	0	18.0081	0	117708	0.0186903	22	0.000929486
PDS3.1_EG1_1167-2.fastq	2	Donor GVR	Standard	PDS3.1	1167	Perfect	GVR	18bp	0	Yes	500	No	19.6042	0	3.18257	0	16.4216	0	17.762	0	28499	0.035089	10	0.00178987
PDS3.1_EG1_1176-1.fastq	2	Donor Nuclease	Standard	PDS3.1	1176	Perfect	Standard	18bp	0	Yes	500	Yes	24.7133	3.93673	6.06077	2.12259	18.6526	1.81414	18.895	0	129505	0.00308868	4	0.00012498
PDS3.1_EG1_1176-2.fastq	2	Donor Nuclease	Standard	PDS3.1	1176	Perfect	Standard	18bp	0	Yes	500	Yes	29.5821	8.19768	6.85073	3.49618	22.7313	4.7015	19.7165	0.880138	96092	0.00936602	9	0.000316612
PDS3.1_EG1_1177-1.fastq	2	Donor Nuclease GVR	Standard	PDS3.1	1177	Perfect	GVR	18bp	0	Yes	500	Yes	37.5074	19.0373	14.3129	11.1256	23.1946	7.91167	20.1419	3.28924	33676	1.07198	361	0.0285805
PDS3.1_EG1_1177-2.fastq	2	Donor Nuclease GVR	Standard	PDS3.1	1177	Perfect	GVR	18bp	0	Yes	500	Yes	48.964	29.5888	22.0272	17.7953	26.9368	11.7935	21.3937	4.33823	7577	1.50455	114	0.0307278
PDS3.1_EG1_1206-1.fastq	2	Nuclease		PDS3.1	1206		Standard			No	0	Yes	22.7258	1.46205	4.82964	0.947753	17.8961	0.514293	17.7831	0	36276	0.0330797	12	0.0014556
PDS3.1_EG1_1206-2.fastq	2	Nuclease		PDS3.1	1206		Standard			No	0	Yes	26.786	6.3518	6.30736	2.91643	20.4787	3.43537	18.9011	0	33342	0.0179953	6	0.000671817
PDS3.1_EG1_1207-1.fastq	2	Nuclease GVR		PDS3.1	1207		GVR			No	0	Yes	27.7779	8.44358	8.34318	4.63116	19.4347	3.81242	17.5463	0.574732	39769	0.0251452	10	0.000905223
PDS3.1_EG1_1207-2.fastq	2	Nuclease GVR		PDS3.1	1207		GVR			No	0	Yes	29.2053	9.75571	8.21798	4.93929	20.9874	4.81642	17.8905	1.00797	29837	0.0201093	6	0.000688547
PDS3.1_EG1_1210-1.fastq	2	SNPDonor Nuclease	Standard	PDS3.1	1210	Imperfect	Standard	18bp	2	Yes	500	Yes	35.1919	15.7578	11.8176	8.56708	23.3743	7.1907	20.0493	2.58815	75489	0.0158964	12	0.000451705
PDS3.1_EG1_1210-2.fastq	2	SNPDonor Nuclease	Standard	PDS3.1	1210	Imperfect	Standard	18bp	2	Yes	500	Yes	40.4396	21.7576	15.5929	12.3516	24.8467	9.40597	20.6567	2.72621	18425	0.0434193	8	0.00107368
PDS3.1_EG1_1211-1.fastq	2	SNPDonor Nuclease GVR	Standard	PDS3.1	1211	Imperfect	GVR	18bp	2	Yes	500	Yes	51.2339	32.3145	18.8108	15.1308	32.423	17.1837	21.3687	4.12918	66499	0.690236	459	0.0134723
PDS3.1_EG1_1211-2.fastq	2	SNPDonor Nuclease GVR	Standard	PDS3.1	1211	Imperfect	GVR	18bp	2	Yes	500	Yes	48.5258	28.3859	20.4006	16.1219	28.1252	12.264	22.5948	5.15951	57013	0.624419	356	0.0128678
PDS3.1_WT-1.fastq	2	WT		PDS3.1	None		None			No	0	No	20.4072	0	3.74506	0	16.6622	0	17.8009	0	62963	0.00794117	5	0.000389135
PDS3.1_EG1_1208-1.fastq	2	SNPDonor	Standard	PDS3.1	1208	Imperfect	Standard	18bp	2	Yes	500	No	20.0044	0	3.08346	0	16.9209	0	15.4282	0	18356	0.00544781	1	0.000272331
PDS3.1_EG1_1208-2.fastq	2	SNPDonor	Standard	PDS3.1	1208	Imperfect	Standard	18bp	2	Yes	500	Yes	17.3806	0	1.99808	0	15.3825	0	16.3542	0	7307	0.0136855	1	0.000787402
PDS3.1_EG1_1209-1.fastq	2	SNPDonor GVR	Standard	PDS3.1	1209	Imperfect	GVR	18bp	2	Yes	500	Yes	21.069	0.640326	3.11651	0	17.9524	0.640326	17.225	0	26119	0.00382863	1	0.000181719
PDS3.1_EG1_1209-2.fastq	2	SNPDonor GVR	Standard	PDS3.1	1209	Imperfect	GVR	18bp	2	Yes	500	Yes	22.0078	1.7271	2.79838	0	19.2094	1.7271	18.3286	0.590848	23728	0.00842886	2	0.000382995
PDS3.2_EG1_1178-1.fastq	2	Donor Nuclease	Standard	PDS3.2	1178	Perfect	Standard	18bp	0	Yes	500	Yes	44.5342	26.7611	13.7147	10.5843	30.8194	16.1768	19.0313	2.62586	61299	0.0277329	17	0.000622733
PDS3.2_EG1_1178-2.fastq	2	Donor Nuclease	Standard	PDS3.2	1178	Perfect	Standard	18bp	0	Yes	500	Yes	37.7335	18.6723	13.0281	8.32697	24.7054	10.3453	18.0764	2.10874	10439	0.0862152	9	0.00228484
PDS3.2_EG1_1179-1.fastq	2	Donor Nuclease GVR	Standard	PDS3.2	1179	Perfect	GVR	18bp	0	Yes	500	Yes	39.7622	21.7364	12.6967	9.73117	27.0655	12.0052	18.822	1.74041	48863	0.812476	397	0.0204334
PDS3.2_EG1_1179-2.fastq	2	Donor Nuclease GVR	Standard	PDS3.2	1179	Perfect	GVR	18bp	0	Yes	500	Yes	43.8083	25.3179	14.136	10.3206	29.6724	14.9973	20.1486	3.29687	34062	0.452117	154	0.0103203
PDS3.2_EG1_1206-1.fastq	2	Nuclease		PDS3.2	1206		Standard			No	0	Yes	23.667	4.91822	5.34775	1.81763	18.3192	3.10059	17.0591	0	69992	0.00142873	1	6.03682e-05
PDS3.2_EG1_1206-2.fastq	2	Nuclease		PDS3.2	1206		Standard			No	0	Yes	28.0893	9.93694	6.41415	2.95508	21.6752	6.98185	17.6709	0	65605	0.00457282	3	0.000162796
PDS3.2_EG1_1207-1.fastq	2	Nuclease GVR		PDS3.2	1207		GVR			No	0	Yes	30.302	11.5101	8.97934	4.83178	21.3226	6.67832	17.4731	0.987695	11326	0.0264877	3	0.000874126
PDS3.2_EG1_1207-2.fastq	2	Nuclease GVR		PDS3.2	1207		GVR			No	0	Yes	28.7797	9.90254	9.34382	5.29435	19.4359	4.60819	18.0737	1.71589	5212	0.0575595	3	0.002
PDS3.2_EG1_1212-1.fastq	2	SNPDonor	Standard	PDS3.2	1212	Imperfect	Standard	18bp	2	Yes	500	No	32.2222	8.48525	11.1111	5.43198	21.1111	3.05327	18.8889	3.68181	180	0	0	0
PDS3.2_EG1_1212-2.fastq	2	SNPDonor	Standard	PDS3.2	1212	Imperfect	Standard	18bp	2	Yes	500	No	30.3797	11.3489	7.59494	4.14564	22.7848	7.20331	10.1266	1.00712	79	0	0	0
PDS3.2_EG1_1213-1.fastq	2	SNPDonor GVR	Standard	PDS3.2	1213	Imperfect	GVR	18bp	2	Yes	500	No	18.852	0	2.73474	0	16.1173	0	18.145	0	19234	0.00519913	1	0.000275786
PDS3.2_EG1_1213-2.fastq	2	SNPDonor GVR	Standard	PDS3.2	1213	Imperfect	GVR	18bp	2	Yes	500	No	19.0081	0	3.39108	0	15.617	0	17.3906	0	12179	0	0	0
PDS3.2_EG1_1214-1.fastq	2	SNPDonor Nuclease	Standard	PDS3.2	1214	Imperfect	Standard	18bp	2	Yes	500	Yes	24.5408	6.14139	6.43111	2.82174	18.1097	3.31965	16.4482	0	22811	0.0087677	2	0.00035727
PDS3.2_EG1_1214-2.fastq	2	SNPDonor Nuclease	Standard	PDS3.2	1214	Imperfect	Standard	18bp	2	Yes	500	Yes	26.87	7.9682	6.482	3.28944	20.388	4.67876	17.3298	1.14301	23249	0.0129038	3	0.000480231
PDS3.2_EG1_1215-1.fastq	2	SNPDonor Nuclease GVR	Standard	PDS3.2	1215	Imperfect	GVR	18bp	2	Yes	500	Yes	33.5157	15.032	9.658	6.48901	23.8577	8.54295	18.1943	1.74097	18275	0.30643	56	0.00914286
PDS3.2_EG1_1215-2.fastq	2	SNPDonor Nuclease GVR	Standard	PDS3.2	1215	Imperfect	GVR	18bp	2	Yes	500	Yes	31.4457	12.691	9.09328	5.57646	22.3524	7.11456	17.6463	2.12203	15363	0.14971	23	0.00476092
PDS3.2_WT-1.fastq	2	WT		PDS3.2	None		None			No	0	No	18.3888	0	2.97511	0	15.4137	0	16.7434	0	38654	0.0103482	4	0.000562746
PDS3.1_EG2_1166-1.fastq	3	Donor	Standard	PDS3.1	1166	Perfect	Standard	18bp	0	Yes	500	No	42.6851	0	6.08472	0	36.6004	0	43.2125	0	52147	0	0	0
PDS3.1_EG2_1166-2.fastq	3	Donor	Standard	PDS3.1	1166	Perfect	Standard	18bp	0	Yes	500	No	42.6602	0.675674	5.89051	0	36.7697	0.675674	43.5204	0	41847	0.00238966	1	5.60161e-05
PDS3.1_EG2_1167-1.fastq	3	Donor GVR	Standard	PDS3.1	1167	Perfect	GVR	18bp	0	Yes	500	No	45.2871	1.94864	6.31744	0	38.9697	1.94864	45.7244	1.48433	35679	0.00280277	1	6.18888e-05
PDS3.1_EG2_1167-2.fastq	3	Donor GVR	Standard	PDS3.1	1167	Perfect	GVR	18bp	0	Yes	500	No	42.8559	0	6.1883	0	36.6676	0	43.152	0	22284	0.00448752	1	0.000104712
PDS3.1_EG2_1176-1.fastq	3	Donor Nuclease	Standard	PDS3.1	1176	Perfect	Standard	18bp	0	Yes	500	Yes	45.9911	3.47666	8.51556	2.38138	37.4756	1.09527	42.7941	0	33750	0	0	0
PDS3.1_EG2_1176-2.fastq	3	Donor Nuclease	Standard	PDS3.1	1176	Perfect	Standard	18bp	0	Yes	500	Yes	50.2889	5.41357	9.39077	3.1068	40.8981	2.30676	47.0562	3.7964	41019	0.00243789	1	4.84778e-05
PDS3.1_EG2_1177-1.fastq	3	Donor Nuclease GVR	Standard	PDS3.1	1177	Perfect	GVR	18bp	0	Yes	500	Yes	49.7267	10.7463	12.516	6.87164	37.2106	3.87465	43.2286	2.22609	21037	0.579931	122	0.0116624
PDS3.1_EG2_1177-2.fastq	3	Donor Nuclease GVR	Standard	PDS3.1	1177	Perfect	GVR	18bp	0	Yes	500	Yes	49.6733	11.7598	12.7021	6.52797	36.9712	5.23179	42.5771	1.99742	8723	0.366846	32	0.00738518
PDS3.1_EG2_1206-1.fastq	3	Nuclease		PDS3.1	1206		Standard			No	0	Yes	44.1416	1.26986	7.58851	1.26986	36.5531	0	42.0641	0	14970	0.00668003	1	0.000151332
PDS3.1_EG2_1206-2.fastq	3	Nuclease		PDS3.1	1206		Standard			No	0	Yes	46.7784	2.0766	5.8473	0	40.9311	2.0766	46.1688	1.74582	7217	0	0	0
PDS3.1_EG2_1207-1.fastq	3	Nuclease GVR		PDS3.1	1207		GVR			No	0	Yes	45.2527	8.08187	10.1389	4.43138	35.1138	3.65049	42.0816	1.33797	15988	0.00625469	1	0.000138217
PDS3.1_EG2_1207-2.fastq	3	Nuclease GVR		PDS3.1	1207		GVR			No	0	Yes	46.3862	7.01755	10.2404	4.54175	36.1458	2.4758	42.4042	1.39926	13310	0	0	0
PDS3.1_EG2_1210-1.fastq	3	SNPDonor Nuclease	Standard	PDS3.1	1210	Imperfect	Standard	18bp	2	Yes	500	Yes	50.7922	9.61336	11.4172	5.37761	39.375	4.23575	45.6416	3.26976	18367	0.0272227	5	0.000535963
PDS3.1_EG2_1210-2.fastq	3	SNPDonor Nuclease	Standard	PDS3.1	1210	Imperfect	Standard	18bp	2	Yes	500	Yes	45.4239	5.68564	8.55812	3.00972	36.8658	2.67592	44.7174	1.5411	6228	0.0160565	1	0.000353482
PDS3.1_EG2_1211-1.fastq	3	SNPDonor Nuclease GVR	Standard	PDS3.1	1211	Imperfect	GVR	18bp	2	Yes	500	Yes	54.4658	20.2425	16.3578	11.1896	38.108	9.05291	42.0961	3.04749	13816	0.318471	44	0.00584718
PDS3.1_EG2_1211-2.fastq	3	SNPDonor Nuclease GVR	Standard	PDS3.1	1211	Imperfect	GVR	18bp	2	Yes	500	Yes	60.3599	24.744	22.6963	16.1073	37.6636	8.63669	45.9174	6.79715	14672	0.129498	19	0.00214544
PDS3.2_EG2_WT-2.fastq	3	WT		PDS3.1	None		None	18bp		No	0	No	41.2343	0	5.21339	0	36.021	0	43.9241	0	15652	0	0	0
PDS3.1_EG2_1208-1.fastq	3	SNPDonor	Standard	PDS3.1	1208	Imperfect	Standard	18bp	2	Yes	500	No	42.9235	1.86839	5.60074	0	37.3228	1.86839	45.5496	1.5253	4303	0.0464792	2	0.00108284
PDS3.1_EG2_1208-2.fastq	3	SNPDonor	Standard	PDS3.1	1208	Imperfect	Standard	18bp	2	Yes	500	No	38.7127	0	5.80216	0	32.9106	0	42.3272	0	3154	0	0	0
PDS3.1_EG2_1209-1.fastq	3	SNPDonor GVR	Standard	PDS3.1	1209	Imperfect	GVR	18bp	2	Yes	500	No	41.6478	1.40507	5.33636	0	36.3114	1.40507	44.52	0.756453	6615	0.0302343	2	0.000725953
PDS3.1_EG2_1209-2.fastq	3	SNPDonor GVR	Standard	PDS3.1	1209	Imperfect	GVR	18bp	2	Yes	500	No	47.8182	5.50917	6.50407	0.617592	41.3141	4.89158	46.3083	3.47494	6027	0	0	0
PDS3.2_EG2_1178-1.fastq	3	Donor Nuclease	Standard	PDS3.2	1178	Perfect	Standard	18bp	0	Yes	500	Yes	54.9316	14.7472	13.124	7.27361	41.8076	7.47363	45.6723	2.67142	4968	0.0402576	2	0.000732869
PDS3.2_EG2_1178-2.fastq	3	Donor Nuclease	Standard	PDS3.2	1178	Perfect	Standard	18bp	0	Yes	500	Yes	53.3444	14.6099	14.2047	7.67762	39.1397	6.93233	44.174	2.5705	4231	0.0236351	1	0.000443066
PDS3.2_EG2_1179-1.fastq	3	Donor Nuclease GVR	Standard	PDS3.2	1179	Perfect	GVR	18bp	0	Yes	500	Yes	47.6071	12.7723	11.3442	6.05051	36.2629	6.72177	40.7681	0.941858	6770	0.251108	17	0.00527459
PDS3.2_EG2_1179-2.fastq	3	Donor Nuclease GVR	Standard	PDS3.2	1179	Perfect	GVR	18bp	0	Yes	500	Yes	55.9225	14.4221	12.3203	6.20764	43.6022	8.21449	46.0378	3.87366	8417	0.083165	7	0.00148715
PDS3.2_EG2_1206-1.fastq	3	Nuclease		PDS3.2	1206		Standard			No	0	Yes	44.2812	2.2182	7.07813	1.66355	37.203	0.554645	43.7301	2.00397	8166	0	0	0
PDS3.2_EG2_1206-2.fastq	3	Nuclease		PDS3.2	1206		Standard			No	0	Yes	44.9614	0	6.92393	0	38.0375	0	45.9757	0.787518	4535	0	0	0
PDS3.2_EG2_1207-1.fastq	3	Nuclease GVR		PDS3.2	1207		GVR			No	0	Yes	51.5038	12.7441	10.8187	5.43492	40.685	7.30921	42.6065	2.27495	2394	0	0	0
PDS3.2_EG2_1207-2.fastq	3	Nuclease GVR		PDS3.2	1207		GVR			No	0	Yes	48.2014	8.06001	11.6707	6.07471	36.5308	1.9853	44.6843	3.74875	1251	0.0799361	1	0.00165837
PDS3.2_EG2_1212-1.fastq	3	SNPDonor	Standard	PDS3.2	1212	Imperfect	Standard	18bp	2	Yes	500	No	48.7805	12.7817	7.31707	4.64873	41.4634	8.13294	12.1951	1.50756	41	0	0	0
PDS3.2_EG2_1212-2.fastq	3	SNPDonor	Standard	PDS3.2	1212	Imperfect	Standard	18bp	2	Yes	500	No	55.814	28.7361	20.9302	19.2944	34.8837	9.4417	39.5349	15.0109	43	0	0	0
PDS3.2_EG2_1213-1.fastq	3	SNPDonor GVR	Standard	PDS3.2	1213	Imperfect	GVR	18bp	2	Yes	500	No	42.927	0.570362	5.64947	0	37.2776	0.570362	42.2153	0	2248	0	0	0
PDS3.2_EG2_1213-2.fastq	3	SNPDonor GVR	Standard	PDS3.2	1213	Imperfect	GVR	18bp	2	Yes	500	No	44.8635	0	5.85608	0	39.0074	0	47.3449	2.14152	2015	0	0	0
PDS3.2_EG2_1214-1.fastq	3	SNPDonor Nuclease	Standard	PDS3.2	1214	Imperfect	Standard	18bp	2	Yes	500	Yes	49.4772	8.91328	10.3879	4.49744	39.0894	4.41585	43.8449	1.72713	2965	0	0	0
PDS3.2_EG2_1214-2.fastq	3	SNPDonor Nuclease	Standard	PDS3.2	1214	Imperfect	Standard	18bp	2	Yes	500	Yes	57.6504	15.2723	11.4989	5.56682	46.1514	9.70551	47.6784	4.42645	3209	0	0	0
PDS3.2_EG2_1215-1.fastq	3	SNPDonor Nuclease GVR	Standard	PDS3.2	1215	Imperfect	GVR	18bp	2	Yes	500	Yes	49.0714	9.16373	10.7246	4.84583	38.3468	4.31789	43.2906	1.53617	3823	0.10463	4	0.0021322
PDS3.2_EG2_1215-2.fastq	3	SNPDonor Nuclease GVR	Standard	PDS3.2	1215	Imperfect	GVR	18bp	2	Yes	500	Yes	51.6415	12.3241	11.9501	5.78903	39.6914	6.53509	44.5174	0.546716	3046	0.13132	4	0.00254291
PDS3.2_EG2_WT-2.fastq	3	WT		PDS3.2	None		None			No	0	No	46.0021	0	7.13958	0	38.8626	0	45.3295	0	6541	0	0	0
